# Supplementary material
Source: Elsevier journal article supplement (https://www.sciencedirect.com/science/article/pii/S0212656714001280)
Supplement: mmc1 [file S0212656714001280:mmc1.docx]

Introducción

Esta información está destinada a las personas con **Dolor Lumbar Crónico Inespecífico**, que es aquél que dura más de 3 meses o que reaparece periódicamente y que se puede extender desde el borde inferior de las costillas hasta las nalgas y puede llegar hasta las piernas y cuya causa no es un cáncer, una infección, una fractura, un síndrome de cola de caballo, una enfermedad vascular o una enfermedad inmunitaria de todo el organismo. Incluye todos aquellos diagnósticos de contractura, músculos cargados, esguince vertebral, pinzamientos, degeneración discal (prolapsos discales, hernias discales), artrosis, osteofitosis, espondilolistesis y demás imágenes de RNM o RX relacionadas con el envejecimiento normal de los tejidos biológicos. No incluye al dolor asociado a los compromisos neuropáticos que cursan con pérdida de fuerza y sensibilidad del miembro inferior y que son producidos por la afectación de raíces nerviosas lumbares, aunque hay que decir que el pronóstico de este proceso es también bueno y su tendencia natural es a la curación, aunque de forma más lenta.

Este cuaderno está diseñado para que sea usted mismo quien valore sus creencias y comportamientos ante el dolor lumbar. Se divide en 7 preguntas con respuestas alternativas; sólo una es la acertada. Elija las respuestas que usted crea que son correctas, márquelas, y finalmente compruebe si está en lo cierto leyendo las soluciones. **Se ha demostrado que las personas que tienen creencias y comportamientos más correctos sobre el dolor lumbar se recuperan antes y sufren menos que las que no**. Así que, cuantas más respuestas correctas tenga usted, mayores probabilidades de superar con éxito su dolor de espalda tendrá. Si sus creencias y comportamientos sobre el dolor lumbar están muy alejados de la realidad tiene usted altas probabilidades de retrasar la recuperación y de volverse alguien dependiente de los demás y poco participativo en actividades cotidianas. En la hoja final de autoevaluación podrá usted comprobar en qué situación se encuentra. El último capítulo del cuaderno presenta una descripción del perfil de la persona que supera con facilidad el dolor de espalda.

Parte I:

¿Qué cree usted acerca del dolor de espalda?

1. ***¿TIENE USTED LA CREENCIA O EL PENSAMIENTO DE QUE ES FÁCIL LESIONARSE O ROMPERSE LOS TEJIDOS DE LA ESPALDA?***

1.a) Si.

1.b) No.

1.c) Depende de la tarea que haga.

1. ***¿CREE USTED QUE EL DOLOR ES SIEMPRE INDICADOR DE DAÑO EN EL CUERPO?***

2.a) No, también pueden existir otras causas de dolor sin daño.

2.b) Sí, si hay dolor es que hay algo dañado.

1. ***LAS IMÁGENES DE RESONANCIA NUCLEAR MAGNÉTICA HAN EVIDENCIADO UNA ALTA FRECUENCIA DE ARTROSIS, DEGENERACIÓN DISCAL, PROLAPSOS Y HERNIAS DISCALES TANTO EN PERSONAS CON DOLOR COMO EN PERSONAS SIN DOLOR DE ESPALDA, ¿COMO EXPLICARÍA ESTE HECHO?***

3.a) La degeneración o pérdida de propiedades de los tejidos de la columna (artrosis, prolapsos, osteofitos…) no es la responsable directa del dolor percibido.

3.b) Cuanto más grande sea la hernia más dolor.

3.c) Porque los que trabajan en oficinas tienen menos dolor.

1. ***¿CREE USTED QUE SI HACE ALGUNA ACTIVIDAD FÍSICA O EJERCICIO EMPEORARÁ SU DOLOR?***

4.a) Si aumenta mi dolor es porque me he hecho daño (se me ha roto algo) en la espalda.

4.b) Si aumenta mi dolor es porque mis músculos han trabajado, pero sé que no me he hecho ningún daño y que esas molestias son pasajeras.

4.c) Creo que sí, y por eso no haré ningún movimiento ni trabajaré hasta que se me quite el dolor por completo.

1. ***¿CÚALES DE LOS SIGUIENTES PENSAMIENTOS Y CONDUCTAS CREE USTED QUE HAN DEMOSTRADO SER CAPACES DE AYUDAR A RECUPERAR MÁS RAPIDAMENTE EL DOLOR DE ESPALDA?***

5.a) Pienso que si hago un mal movimiento me puedo hacer daño, así que estaré muy pendiente del dolor y me moveré con cautela para no lesionarme: “hay que tener cuidado con los movimientos que haga porque me puedo quedar inválido”.

5.b) Este dolor me ha dado antes y sé que se me irá pasando. No pienso dejar de hacer mi vida normal por culpa de algo que sé que no es grave ni progresivo.

5.c) Estoy continuamente pendiente del dolor para comprobar cuando va doliendo menos: “hasta que no me duela menos no voy a moverme ni trabajar en absoluto”.

1. ***¿CREE USTED QUE ESTAR ATENTO AL DOLOR QUE SE SIENTE INFLUYE EN LA EVOLUCIÓN O PRONÓSTICO DEL DOLOR?***

6.a) No, no tiene nada que ver.

6.b) Sí, si que influye.

1. ***EN CUANTO AL TRATAMIENTO DEL DOLOR DE ESPALDA, ¿CÚAL CREE USTED QUE ES EL MEJOR MANEJO QUE SE PUEDE HACER SEGÚN LA EVIDENCIA CIENTIFICA DISPONIBLE?***

7.a) Si hay un prolapso o una hernia discal, sin duda intervenir quirúrgicamente.

7.b) Reposo en cama, masaje y calor.

7.c) Información adecuada, mantenerse activo y medicación.

Parte II:

Solución de las cuestiones planteadas basadas en las mejores evidencias científicas disponibles sobre el manejo del dolor lumbar inespecífico.

1. ***¿TIENE USTED LA CREENCIA O EL PENSAMIENTO DE QUE ES FÁCIL LESIONARSE O ROMPERSE LOS TEJIDOS DE LA ESPALDA?***

**1.a) RESPUESTA ERRONEA:** La columna vertebral es una de las estructuras más solidas y resistentes del cuerpo humano. Está diseñada para soportar grandes cargas y para moverse, tanto es así que cuando no se mueve (pacientes encamados) o cuando no se somete a carga durante algún tiempo (vida en el espacio de los astronautas) se debilita y pierde su resistencia. Si piensa que la columna vertebral es muy frágil vivirá con más ansiedad y miedo de hacerse daño, lo que le generará menor actividad física y el uso de movimientos tensos que acarrean dolor de espalda o mantenimiento del mismo.

**1.b) RESPUESTA CORRECTA.** Pensar así le ayudará a vivir más plenamente y sin miedo a hacerse daño en la espalda, con lo cual también controlará mejor el dolor que las personas que creen que la espalda es muy frágil y se puede dañar en cualquier momento: estas personas están tan pendientes de cualquier sensación corporal que sirva de alerta que, sin querer ellos, vuelven hipersensibles y alarmistas a los territorios cerebrales que se encargan de avisarles de los peligros físicos mediante la sensación consciente de dolor; la consecuencia de esto es la percepción repetida de dolor como falsa alarma. Esto sería un ejemplo de cómo una creencia errónea instaurada en los circuitos cerebrales de procesamiento de la información puede contribuir a la Sensibilización Central del Dolor (complejo mecanismo neurofisiológico por el cual se puede llegar a percibir dolor ante cualquier estímulo aunque este no sea en absoluto dañino para el cuerpo).

**1.c) RESPUESTA ERRONEA.** Las tareas habituales de la vida diaria no pueden lesionar o romper su espalda. Solo grandes traumatismos como accidentes (que provocan fracturas de las vertebras) o enfermedades como el cáncer pueden afectar la estructura de la espalda.Si piensa que su columna vertebral es muy frágil vivirá con más ansiedad y miedo de hacerse daño, lo que le generará menor actividad física y el uso de movimientos tensos que acarrean dolor de espalda, mantenimiento del mismo y preocupación por sensaciones de incomodidad corporal que pueden ser totalmente normales tras la realización de cualquier actividad física. Esta creencia errónea y la preocupación mental que ocasiona puede contribuir a sensibilizar a su sistema nervioso central ante los ambiguos aspectos de las sensaciones físicas (movimiento, estiramiento, compresión, contracción, tacto, temperatura…) y convertir información corporal que sería irrelevante para el cerebro en condiciones normales, en información dolorosa; al fin y al cabo, el dolor no es más que la llegada a nuestra conciencia de la evaluación de la información recogida por todos los receptores de nuestro organismo y procesada por nuestro cerebro en base al aprendizaje acumulado por experiencias previas y de otros que sean relevantes para nosotros, como medios de comunicación, personal sanitario y familiares o amigos de los que tengamos una percepción valiosa en sus opiniones.

1. ***¿CREE USTED QUE EL DOLOR ES SIEMPRE INDICADOR DE DAÑO EN EL CUERPO?***

**2.a) RESPUESTA CORRECTA.** Existen muchos ejemplos de gran dolor sin ningún daño, el más conocido podría ser el dolor que sienten algunas personas amputadas (dolor fantasma): sienten un dolor muy fuerte en el pie y sin embargo… ¡¡ni siquiera tienen pie!!... Imagínese que en el caso descrito, la persona afectada de ese dolor aún tuviese el pie: achacaría sin dudar su problema a la artrosis, las tendinitis, el calzado, la circulación… y, sin embargo, cuando desapareció el pie, el problema continuaba igual. Las vías nerviosas y las áreas cerebrales que controlan e interpretan el dolor son las responsables del dolor percibido cuando no existe ningún daño en el cuerpo (“Sensibilización Central del Dolor” y “Sensibilización Periférica del Dolor”). Si usted piensa positivamente acerca del dolor de espalda (no imaginándose que tiene algo grave aplastándole o pinchándole, por ejemplo) tendrá más probabilidades de superar sin sufrimiento y sin tener que tomar grandes cantidades de medicamentos los episodios de dolor que “todos” los seres humanos experimentamos a lo largo de la vida.

**2.b) RESPUESTA ERRONEA.** Nada más lejos de la realidad. El dolor achacable a daño en los tejidos de nuestro cuerpo sólo duraría desde los primeros momentos tras la lesión hasta la cicatrización (pensad, por ejemplo, en una herida en la piel tras una caída o un corte: cuando cicatriza y desaparece ya no duele; en tejidos más profundos que no vemos también cicatrizan las lesiones). Es más aún, incluso esta afirmación habría que matizarla, ya que todos conocemos casos de personas que han sufrido daños en los tejidos, como fracturas, cortes, puñaladas, disparos, infartos e incluso metástasis…) y no han percibido dolor. Y esto es así porque la percepción final del dolor depende de lo que interprete nuestro cerebro en ese momento y en esas circunstancias concretas: “si voy huyendo de los disparos de los soldados enemigos, es probable que no sienta el dolor de un impacto de bala hasta que no esté a salvo en la trinchera” (el cerebro ha tenido que estar procesando otro tipo de informaciones mucho más importantes para salvarme la vida que en una lesión de piel, músculos…). En cualquier caso, y aceptando que las lesiones produzcan dolor en nuestro entorno habitual en el que el cerebro no tiene otras prioridades más vitales, pasadas unas semanas se curarían los tejidos dañados, y el dolor se iría atenuando y finalmente desapareciendo. Si no lo hace, las sensaciones de dolor ya no pueden ser atribuidas a una señal de alarma de que algo va mal (ya que el tejido lesionado ha cicatrizado perfectamente) y puede que estén más relacionadas con otros factores (como el miedo a la relesión, hipervigilancia del dolor, ansiedad, anticipación al dolor, mala forma física…) que con factores de la propia lesión. Cuando estamos vigilantes del dolor y con miedo y ansiedad a causa de él, tanto las áreas cerebrales que procesan información como los nervios que conducen el dolor experimentan cambios que hacen que el dolor se siga sintiendo incluso cuando ya se han curado las lesiones: si nos hemos esforzado por mantener en guardia nuestra atención ante cualquier sensación en la espalda para “frenar” un posible empeoramiento (conducta mal adaptada basada en el miedo y la creencia de fragilidad de la columna), hemos vuelto sensible e hiperactivo a nuestro sistema nervioso, el cual podrá interpretar cualquier sensación (más aún las desagradables), por inofensivas que estas pudiesen ser, como dolor (acuérdese del conocido ejemplo anterior del dolor fantasma en el que puede sentirse dolor incluso sin estar presente la parte del cuerpo que duele).

Si usted no acepta la posibilidad de que se pueda percibir dolor sin ningún tipo de daño físico, cada vez que sienta dolor lo relacionará con algún tipo de lesión en su cuerpo, y esa forma de pensar produce ansiedad, miedo, desesperación, inmovilidad, y se aleja de la realidad del funcionamiento humano normal. Si se mueve con miedo al daño, sus movimientos serán más tensos y menos naturales, lo que favorece el mantenimiento del dolor. Intente recordar que la columna es una de las estructuras más resistentes de su cuerpo y que hay personas que, a pesar de haber trabajado durante toda su vida, llegan a los cien años con su columna en funcionamiento.

1. ***LAS IMÁGENES DE RESONANCIA NUCLEAR MAGNÉTICA HAN EVIDENCIADO UNA ALTA FRECUENCIA DE ARTROSIS, DEGENERACIÓN DISCAL, PROLAPSOS Y HERNIAS DISCALES TANTO EN PERSONAS CON DOLOR COMO EN PERSONAS SIN DOLOR DE ESPALDA, ¿COMO EXPLICARÍA ESTE HECHO?***

**3.a) RESPUESTA CORRECTA.** Otros muchísimos factores influyen en el dolor que se siente (baja forma física, miedo a lesionarse la espalda, actitud de catastrofismo ante el dolor, ansiedad, depresión, ausencia de metas personales que compitan con la preocupación por el dolor…). Si las imágenes de degeneración que se observan en las pruebas de imagen fuesen las causas directas de dolor, a todos nos dolería continuamente la espalda, ya que a todos se nos va degenerando la columna al igual que el resto del cuerpo. Ejemplos relacionados con esta pregunta a los que se les puede aplicar el sentido común serían: …si alguien (incluidos profesionales sanitarios) me ha afirmado que me duele la espalda porque en la radiografía sale “mucha artrosis” y osteofitos (“picos de loro” que me “pinchan” los músculos de la espalda y los nervios…), ¿cómo es que a veces no me duele si los picos siempre van a estar ahí?... Si la artrosis es la causa de dolor… ¿por qué a mi abuelo de 87 años no le duele la espalda?. Son solo dos ejemplos, pero os animamos a seguir pensando más incongruencias en las creencias erróneas tradicionalmente y culturalmente aceptadas acerca del dolor.

**3.b) RESPUESTA ERRONEA.** La presencia de hernia no indica que se tenga que tener dolor para toda la vida. Muchas personas con hernias ni siquiera se enteran de que las tienen. En la fase inflamatoria (al principio) de una hernia puede haber dolor, como, por ejemplo, cuando te haces una herida, pero cuando va cicatrizando y el cuerpo se adapta, al igual que cuando cicatriza la herida, el dolor va desapareciendo. Una gran hernia reciente que afecte de forma importante una raíz nerviosa te va a dar síntomas bien distintos al dolor. Si usted tiene asumido que su envejecimiento normal de columna (artrosis, prolapsos, hernias…) son la causa directa del dolor que siente tiene un gran problema, ya que tendrá miedo a moverse con lo cual no se atreverá a ponerse en forma, y estará muy pendiente a las molestias que sienta, lo cual aumenta la percepción de dolor, el miedo y el sentimiento de no poder tener una vida plena.

**3.c) RESPUESTA INCORRECTA**. El tipo de oficio no se relaciona con el dolor percibido: hay oficinistas con un gran dolor y trabajadores del campo o la construcción que viven perfectamente con las molestias que todos los humanos podemos sentir en la espalda a lo largo de la vida. El exceso de movimientos repetidos de elevación de grandes pesos durante largos periodos de tiempo sí parece asociarse a más “probabilidad de sentir dolor lumbar”, que es diferente de “probabilidad de romperse o lesionarse” la espalda (dolor y daño no siempre son una misma cosa). Otros factores influyen más decisivamente en no superar el dolor: la falta de forma física, la interpretación catastrófica de las sensaciones dolorosas, el miedo a lesionarse, la hipervigilancia en el dolor, la ausencia de metas personales que compitan con la de no sentir dolor, ansiedad, depresión, creer que se puede vivir todos los momentos de la vida sin ningún dolor (meta personal irrealista)…

1. ***¿CREE USTED QUE SI HACE ALGUNA ACTIVIDAD FÍSICA O EJERCICIO EMPEORARÁ SU DOLOR?***

**4.a) RESPUESTA INCORRECTA**. La columna es muy resistente, solo con grandes traumatismos o enfermedades graves te la puedes dañar. La artrosis, pinzamientos, degeneración de los discos (prolapsos y hernias) no son daño de la columna sino el resultado normal del paso de los años, es inevitable que se nos vaya degenerando, y por supuesto no son las responsables absolutas del dolor ya que si fuese así todos estaríamos continuamente con dolor. Las grandes elevaciones de cargas muy pesadas y repetidas durante mucho tiempo requerirían un buen entrenamiento físico por su parte asociado a tiempos suficientes de descanso para reducir las probabilidades de sentir dolor. Los ejercicios moderados-intensos sólo podrían ocasionar, como mucho, leves molestias musculares pasajeras, a expensas de una ganancia de fuerza, elasticidad y resistencia física.

**4.b) RESPUESTA CORRECTA**. Si hace un trabajo físico con unos músculos desentrenados es normal que luego tenga molestias. Ese dolor no quiere decir que se haya roto nada en la espalda. Si haciendo ejercicio físico fuerte o moderado se pudiera dañar la espalda… ¡imagínese que le ocurriría a los culturistas o practicantes de halterofilia que pueden levantar más de 200 kilos!.

**4.c) RESPUESTA INCORRECTA**. La columna es muy resistente y no se la puede dañar haciendo ejercicio. Si usted es de los que espera a no sentir ninguna molestia para volver a trabajar o hacer ejercicio estará condenado a perder la forma física (fuerza, resistencia, coordinación…) y con ello a tener problemas para recuperarse. Cuanto antes retome su vida normal mayores probabilidades de superar el problema del dolor. Tampoco deberíamos olvidar los efectos de la falta de actividad física en otros sistemas, como el cardiovascular, endocrino, metabólico… Imagínese la situación de muchas personas que han abandonado la práctica de una actividad física por miedo al dolor o al daño lumbar (¡miedos totalmente infundados!): “han estropeado una buena salud por una creencia equivocada sobre la naturaleza del dolor lumbar inespecífico”.

1. ***¿CÚALES DE LOS SIGUIENTES PENSAMIENTOS Y CONDUCTAS CREE USTED QUE HAN DEMOSTRADO SER CAPACES DE AYUDAR A RECUPERAR MÁS RAPIDAMENTE EL DOLOR DE ESPALDA?***

**5.a) RESPUESTA INCORRECTA.** Las personas que piensan y actúan así son las que al parecer desarrollan dolor crónico de espalda y tienen problemas para recuperarse. El miedo al daño y el pensar catastróficamente, por ejemplo, imaginarse la columna como piezas rotas o deformadas que pinchan, aplastan o rozan y que cada vez están más estropeadas y expresar los síntomas en términos de enfermedad grave que produce un gran sufrimiento…, activan las áreas de su cerebro que procesan el dolor y lo aumentan y mantienen aún cuando no existe ningún daño grave en la espalda. Además, al moverse con tanta tensión para “no lesionarse”, acaban produciendo movimientos poco normales que pueden ayudar a mantener el dolor.

**5.b) RESPUESTA CORRECTA**. Estas personas se recuperan rápidamente de los episodios de dolor y no viven con el sufrimiento y la preocupación que produce estar siempre pendiente del mismo. Comprenden que “la vida es corta” y no merece la pena vivirla siempre preocupado por algo que es inevitable: todos vamos a padecer algún dolor de vez en cuando y, salvo en presencia de patologías graves (cáncer, fracturas, infecciones y alteraciones inmunológicas…), el dolor musculoesquelético es considerado como algo benigno.

**5.c) RESPUESTA INCORRECTA.** La continua atención en el dolor hace que las áreas del cerebro que controlan ese dolor se vuelvan hiperactivas y tiendan a perpetuar la sensación dolorosa. Al mismo tiempo, esperar a que desaparezca el dolor para retomar la actividad física solo empeorará la situación ya que su cuerpo pierde fuerza y resistencia, con lo cual cualquier tarea que haga le puede producir más molestias. Piense en la rápida recuperación de los deportistas: “actividad precoz a pesar de tener todavía dolor; su motivación no es *no percibir dolor*, sino *ser capaz* de volver a competir cuanto antes…”

1. ***¿CREE USTED QUE ESTAR ATENTO AL DOLOR QUE SE SIENTE INFLUYE EN LA EVOLUCIÓN O PRONÓSTICO DEL DOLOR?***

**6.a) RESPUESTA INCORRECTA.** Se ha demostrado que la atención mental en el dolor es un potente factor para perpetuar las sensaciones dolorosas. Al igual que nuestro cerebro aprende a hacer tareas cuando estamos muy atentos a dicha tareas, o podemos disfrutar más de una caricia si nos centramos exclusivamente en ella, también el cerebro nos puede hacer experimentar más dolor si nos centramos en la sensación dolorosa. El cerebro es capaz de aprender; aprender es cambiar, destruir y crear nuevos circuitos neuronales mediante complejos mecanismos neurobiológicos. La atención es una herramienta básica para el aprendizaje: cuando está demasiado centrada en el dolor podemos estar favoreciendo un “aprendizaje” (cambios de circuitos neuronales que influirán en la recepción y expresión del dolor) incorrecto para la evaluación de los estímulos corporales; podemos estar convirtiendo nuestro cerebro en un mal evaluador de la información que recibe, lo que le obligará a avisarnos continuamente de peligros que no existen mediante la sensación aprendida de dolor.--- La atención influye, así, en el ya mencionado mecanismo de Sensibilización Central del Dolor, el cual es capaz de mantener las sensaciones dolorosas en ausencia de estímulos dañinos. Otro ejemplo que puede ayudar a entender el papel de la atención en el dolor es la observación de los mecanismos de su término contrario, la “distracción del dolor”: un niño se cae y se hace una herida en rodillas, manos, cara… tiene la piel rota, sangra, hay arena clavada en su carne… numerosos focos de información dolorosa, tantos, que el niño llora y se desespera… alguien le da su juguete favorito y, a los cinco segundos, el niño está jugando y sonriendo y ya no hay llantos, solo hay una hermosa atención centrada en algo que le apasiona. De mayores parece que se nos olvida el poder de centrar nuestra atención en cosas y tareas que nos agraden y requieran entrega mental para superar los episodios inevitables de malestares y dolor.

**6.b) RESPUESTA CORRECTA**. Cuanto más atentos estemos al dolor más probabilidades tenemos de que tarde más en desaparecer. Si usted es de esas personas que no está hipervigilante y con pensamientos catastróficos acerca del dolor no tendrá problemas para superar los episodios de dolor que tenga a lo largo de su vida.

1. ***EN CUANTO AL TRATAMIENTO DEL DOLOR LUMBAR CRÓNICO INESPECÍFICO, ¿CÚAL CREE USTED QUE ES EL MEJOR MANEJO QUE SE PUEDE HACER SEGÚN LA EVIDENCIA CIENTIFICA DISPONIBLE?***

**7.a) RESPUESTA ERRONEA**: La mayoría de las personas que se operan la columna debido a su dolor continúan con dolor o vuelve a reaparecer. Por eso no se recomienda operar y cada vez se hace menos. En **muy pocos casos** es necesario operar, y no lo determina la presencia de dolor, sino otros síntomas neurológicos graves muy fáciles de detectar, incluso sin necesidad de hacer pruebas de imagen.

**7.b) RESPUESTA ERRONEA**: La antigua recomendación de quedarse en cama hasta que pasase el dolor ha sido un desastre: cuanto más tiempo en cama más pérdida de forma física y con ello peor recuperación del dolor. El calor y el masaje no están contraindicados, pero tampoco han demostrado ser eficaces para recuperar la forma física ni el dolor crónico. Además, si usted sólo utiliza terapias pasivas (sin que usted haga nada) se va creando la idea de que usted mismo por sí sólo no puede hacer nada por su dolor, y es justo todo lo contrario: si usted es capaz de entender que su dolor no se debe a ningún daño grave, es capaz de cambiar los pensamientos negativos catastrofistas del dolor por otros más positivos y realistas y se mantiene lo más activo posible, ya estará haciendo un gran trabajo para recuperarse sin problemas.

**7.c) RESPUESTA CORRECTA**: si usted **entiende** que el dolor que siente no se debe a una enfermedad grave y que la columna vertebral es resistente va a vivir más tranquilo y con menos ansiedad y miedo a hacerse daño, lo cual ya puede reducir el dolor que siente. Se ha demostrado que las personas que reciben esta información y la comprenden se sobreponen mejor del dolor de espalda y participan más activamente en su recuperación. Su médico de familia le puede asesorar en el uso de medicación. Su fisioterapeuta le puede ayudar a mejorar los deterioros relacionados con el movimiento. Por otro lado, si usted se mantiene activo, en la medida que pueda, en las tareas de su vida diaria e incluso en el trabajo, su dolor se controlará mejor; lo contrario es mucho peor: las personas que se meten varios días en la cama o reducen mucho su actividad normal por el dolor sólo consiguen debilitar aún más los músculos y empeorar la situación. Si además decide hacer ejercicio físico para mejorar su capacidad de fuerza, flexibilidad, resistencia…estará en el buen camino: las personas con mejor forma física parecen tener menos dolor y cuando lo tienen lo superan antes, además de estas más sanas. Si además se propone conseguir alguna meta personal que sea mentalmente prioritaria a tener como meta personal no percibir nunca dolor (meta irrealista), se habrá librado del sufrimiento crónico del dolor.

**Autoevaluación**

*ANOTE EL NÚMERO DE RESPUESTAS CORRECTAS E INCORRECTAS QUE HA TENIDO EN EL SIGUIENTE CUADRANTE:*

| **CREENCIAS CORRECTA S** | **CREENCIAS INCORRECTAS** |
| --- | --- |
|  |  |

**MAYORIA DE CREENCIAS CORRECTAS:**

Esta usted en el buen camino. Usted es de los que comprende que la degeneración de la columna es un proceso normal del paso de los años. Acepta con sentido común el dolor de espalda que todas las personas podemos sentir eventualmente a lo largo de la vida. Usted se ha dado cuenta de que si se mantiene activo (tareas diarias, trabajo, ejercicio…), el dolor pasa antes. También sabe que si se centra demasiado en el dolor éste puede hacerse interminable, y que si interpreta el dolor como algo catastrófico es más probable que le acompañe para siempre y no le deje centrarse en tener una vida plena y disfrutar de las cosas que le gustan. Usted no tendrá problemas para superar sus episodios de dolor lumbar.

**MAYORIA DE CREENCIAS INCORRECTAS:**

Es probable que sus creencias y conductas acerca del dolor estén influyendo en el mantenimiento del dolor que siente. Para retomar el buen camino hacia la recuperación sería necesario que:

- Deje de asumir que “degeneración de la columna” es igual a “dolor” y que si se percibe dolor es que hay algo roto o dañado. Puede que esto sea el meollo de la cuestión. Acuérdese de algún anciano de 90 años al que no le duela la espalda, o de la persona amputada que puede llegar a sentir dolor en un pie sin siquiera tener el pie. El dolor percibido es el resultado de muchos factores, tanto físicos como mentales, culturales, sociales… muchos de ellos está en su mano aprender a mejorarlos.
- Intente ponerse en mejor forma física, alejando los antiguos pensamientos de daño (imágenes mentales de vertebras aplastadas, relieves óseos que pinchan, cuerdas tensas que tuercen, huesos que rozan…) cuando el ejercicio físico produzca algunas molestias. Piense mejor en el beneficio que le está aportando a sus músculos, huesos, corazón, pulmones…
- Intente relajarse y ponga su atención en otras áreas del cuerpo que no sean las doloridas: con práctica notará como cuanto menos se centre en el dolor menos dolerá. Intente entregar su atención a alguna tarea que le resulte agradable. Póngase alguna meta a conseguir a corto plazo que compita con su meta de no percibir dolor y céntrese con toda su fuerza en conseguirla.
- No deje entrar en su cabeza pensamientos negativos y catastróficos del tipo: “me voy a quedar invalido”, “no puedo dejar de pensar en el dolor”, “es más fuerte que yo”, “nunca se me va a quitar”…

Merece la pena que lo intente. El sentido común debería conducirnos a hacer algo diferente si lo que hemos hecho hasta ahora no ha servido para nada. Con esa nueva visión podrá explorar caminos diferentes que le pueden hacer descubrir que dentro de usted existen recursos para tener una vida más plena.

Perfil de la persona que supera con facilidad el dolor de espalda

*Alguien que se recupera sin problemas de su dolor lumbar es una persona que ha comprendido que su dolor no se debe a ninguna causa grave de la columna vertebral y que por consiguiente intenta mantenerse lo más activo posible porque sabe que cuando reduce su actividad se siente luego peor, con menos fuerza y menos energía. Es alguien que no se pone ansioso ante el dolor porque sabe que va a ir mejorando. Es alguien que no se deprime y se siente desgraciado ante el dolor porque acepta y comprende que es inevitable sentir dolor a lo largo de la vida y que todas las personas lo padecemos alguna vez. Es alguien positivo que afronta el dolor con optimismo porque sabe que no durará para siempre. Es alguien que se mueve sin la tensión que produce el miedo a hacerse daño, porque sabe que su columna es resistente y que las molestias que se producen durante el movimiento son temporales. Es alguien que sabe que no hay ningún remedio inmediato para quitar el dolor, por eso lo acepta como normal y continúa con su ritmo de vida, y no deja que el dolor le haga perder oportunidades de vivir plenamente, de trabajar y de disfrutar de las actividades que más le guste. Es alguien que no se centra continuamente en el dolor porque se ha dado cuenta de que nuestra atención es como una lente de aumento: cuanto más se centre en el dolor más lo sentirá. Es alguien a quién le gusta la actividad física y hace ejercicio regularmente, porque sabe que cuando no lo hace se siente con menos energía y fuerza y todo le molesta más. En definitiva, es alguien valiente y optimista, que no deja que la ansiedad ni la tristeza derivados de pensamientos negativos erróneos e infundados se apoderen de él, y que no permite que el dolor lo aparte de sus metas y planes de vida.*

Bibliografía

1. Grupo Español de Trabajo del Programa Europeo COST B13. Guía de Práctica Clínica para la Lumbalgia Inespecífica. URL: [www.REIDE.org](http://www.REIDE.org), visitada el 15 de diciembre de 2005.
2. Pérez Irazusta I., Alcorta Michelena I., Aguirre Lejarcegui G., Aristegui Racero G., Caso Martínez J., Esquisabel Martínez R., López de Goicoechea Fuentes AJ., Martínez Eguía B., Perez Rico M., Pinedo Otaola S., Sainz de rozas Aparicio R. Guía de Práctica Clínica sobre Lumbalgia Osakkidetza. GPC 2007/1. Vitoria-Gasteiz.
3. Savigny P, Kuntze S, Watson P, Underwood M, Ritchie G, Cotterell M, Hill D, Browne N, Buchanan E, Coffey P, Dixon P, Drummond C, Flanagan M, Greenough C, Griffiths M, Halliday-Bell J, Hettinga D, Vogel S, Walsh D. Low Back Pain: early management of persistant non-specific low back pain. London 2009: National Collaborating Centre for Primary Care and Royal College of General Practitioners.
4. S.E. Lamb, Z. Hansen, R. Lall, E. Castelnuovo, E.J. Withers, V. Nichols et al. Group cognitive behavioural treatment for low-back pain in primary care: a randomised controlled trial and cost-effectiveness analysis**.**  Lancet. 2010); 375(9718): 916–923.
5. Hansen Z, Daykin A, Lamb SE. A cognitive-behavioural programme for the management of low back pain in primary care: a description and justification of the intervention used in the Back Skills Training Trial (BeST; ISRCTN 54717854). Physiotherapy. 2010; 96(2):87-94.
6. Ramond A, Bouton C, Richard I, Roquelaure Y, Baufreton C, Legrand E, Huez JF. Psychosocial risk factors for chronic low back pain in primary care – a sistematic review. Fam Pract 2011; 28(1):12-21.
7. Pincus T, Smeets RJ, Simmonds MJ, Sullivan MJ. The fear avoidance model disentangled: improving the clinical utility of the fear avoidance model. Clin J Pain. 2010; 26(9):739-46.
8. Vranceanu AM, Barsky A, Ring D. Psychosocial aspects of disabling musculoeskeletal pain. J Bone Joint Surg Am. 2009; 91(8): 2014-8.
9. Rainville J, Smeets RJ, Bendix T, Tveito TH, Poiraudeau S, Indahl AJ. Fear-avoidance beliefs and pain avoidance in low back pain--translating research into clinical practice. Spine J. 2011;11(9):895-903.
10. Larivière C, Bilodeau M, Forget R, Vadeboncoeur R, Mecheri H. [Poor back muscle endurance is related to pain catastrophizing in patients with chronic low back pain.](http://www.ncbi.nlm.nih.gov/pubmed/20881658) Spine (Phila Pa 1976). 2010; 35(22):E1178-86.
11. Seminowicz DA, Davis KD. Cortical responses to pain in healthy individuals depends on pain catastrophizing. Pain. 2006; 120(3):297–306.
12. Quartana P, Burns J, Lofland K. Attentional strategy moderates effects of pain catastrophizing on symptom-specific physiological responses in chronic low back pain patients. J Behav Med. 2007;30(3):221–231.
13. [Dupeyron A](http://www.ncbi.nlm.nih.gov/pubmed?term=Dupeyron%20A%5bAuthor%5d&cauthor=true&cauthor_uid=21782541), [Ribinik P](http://www.ncbi.nlm.nih.gov/pubmed?term=Ribinik%20P%5bAuthor%5d&cauthor=true&cauthor_uid=21782541), [Gélis A](http://www.ncbi.nlm.nih.gov/pubmed?term=G%C3%A9lis%20A%5bAuthor%5d&cauthor=true&cauthor_uid=21782541), [Genty M](http://www.ncbi.nlm.nih.gov/pubmed?term=Genty%20M%5bAuthor%5d&cauthor=true&cauthor_uid=21782541), [Claus D](http://www.ncbi.nlm.nih.gov/pubmed?term=Claus%20D%5bAuthor%5d&cauthor=true&cauthor_uid=21782541), [Hérisson C](http://www.ncbi.nlm.nih.gov/pubmed?term=H%C3%A9risson%20C%5bAuthor%5d&cauthor=true&cauthor_uid=21782541), [Coudeyre E](http://www.ncbi.nlm.nih.gov/pubmed?term=Coudeyre%20E%5bAuthor%5d&cauthor=true&cauthor_uid=21782541). [Education in the management of low back pain: literature review and recall of key recommendations for practice.](http://www.ncbi.nlm.nih.gov/pubmed/21782541.1) Ann Phys Rehabil Med. 2011; 54(5): 319-35.
14. Bakker EW, Verhagen AP, van Trijffel E, et al. Spinal mechanical load as a risk factor for low back pain: a systematic review of prospective cohort studies. Spine. 2009; 34(8): E281-93.
15. [Sorensen PH](http://www.ncbi.nlm.nih.gov/pubmed?term=Sorensen%20PH%5bAuthor%5d&cauthor=true&cauthor_uid=21782541), [Bendix T](http://www.ncbi.nlm.nih.gov/pubmed?term=Bendix%20T%5bAuthor%5d&cauthor=true&cauthor_uid=21782541), [Manniche C](http://www.ncbi.nlm.nih.gov/pubmed?term=Manniche%20C%5bAuthor%5d&cauthor=true&cauthor_uid=21782541), [Korsholm L](http://www.ncbi.nlm.nih.gov/pubmed?term=Korsholm%20L%5bAuthor%5d&cauthor=true&cauthor_uid=21782541), [Lemvigh D](http://www.ncbi.nlm.nih.gov/pubmed?term=Lemvigh%20D%5bAuthor%5d&cauthor=true&cauthor_uid=21782541), [Indahl A](http://www.ncbi.nlm.nih.gov/pubmed?term=Indahl%20A%5bAuthor%5d&cauthor=true&cauthor_uid=21782541). [An educational approach based on a non-injury model compared with individual symptom-based physical training in chronic LBP. A pragmatic, randomised trial with a one-year follow-up.](http://www.ncbi.nlm.nih.gov/pubmed/20849601.1) BMC Musculoskelet Disord. 2010; 11:212.
16. [Louw A](http://www.ncbi.nlm.nih.gov/pubmed?term=Louw%20A%5bAuthor%5d&cauthor=true&cauthor_uid=21782541), [Puentedura EL](http://www.ncbi.nlm.nih.gov/pubmed?term=Puentedura%20EL%5bAuthor%5d&cauthor=true&cauthor_uid=21782541), [Mintken P](http://www.ncbi.nlm.nih.gov/pubmed?term=Mintken%20P%5bAuthor%5d&cauthor=true&cauthor_uid=21782541). [Use of an abbreviated neuroscience education approach in the treatment of chronic low back pain: a case report.](http://www.ncbi.nlm.nih.gov/pubmed/21721995.1) Physiother Theory Pract. 2012; 28(1):50-62.
17. Moseley GL. Evidence for a direct relationship between cognitive and physical change during an education intervention in people whith chronic low back pain. Eur J Pain. 2004; 8(1): 39-45.
18. Westman AE, Boersma K, Leppert J, et al. Fear-avoidance beliefs, catastrophizing, and distress: a longitudinal subgroup analysis on patients with musculoskeletal pain. Clin J Pain. 2011; 27(7): 567-77.
19. Kent P, Kjaer P. The efficacy of targered interventiuons for modifiable psychosocial risk factors of persistent nonspecific low back pain – a systematic review. Man Ther. 2012; 17(5): 385-401.
20. Lumley MA, Cohen JL, Borszcz GS, et al. Pain and Emotion: A Biopsychosocial Review of Recent Research. J Clin Psychol. 2011; 67(9):942-968.
21. Staud R. Abnormal endogenous pain modulation is a shared characteristic of many chonic pain conditions. Expert Rev Neurother. 2012; 12(5): 577-85.
22. Nijs J, Van Wilgen CP, Van Oosterwijck J,et al. How to explain central sensitization to patients with “unexplained” chronic musculoskeletal pain: Practice guidelines. Man Ther. 2011; 16(5):413-8.
23. Wright A, Zusman M. Neurofisiología y modulación del dolor, En Grieve, Terapia Manual Contemporánea. Columna Vertebral. Masson 2006, pág. 155- 171.
